# Supplementary material for: A novel de novo truncating variant in a Hungarian patient with CTNNB1 neurodevelopmental disorder
Source: Springer Nature journal article supplement (doi:10.1186/s12887-023-04509-w), 2024-01-15
Supplement: MOESM3 [file 26629266]

Additional Table 1.

|                                                                                                                                                                                                                              |                                          |
|------------------------------------------------------------------------------------------------------------------------------------------------------------------------------------------------------------------------------|------------------------------------------|
|                                                                                                                                                                                                                              | <b><i>CTNNB1</i>:c.1902dupG p.E634fs</b> |
| <b>ACMG Classification</b>                                                                                                                                                                                                   | Likely pathogenic (LP)                   |
| <b>Effect on Protein</b>                                                                                                                                                                                                     | Pathogenic Very Strong (PVS1)            |
| <b>Population data</b>                                                                                                                                                                                                       | Pathogenic Moderate (PM2)                |
| <b>gnomAD (Exome, Genome, Aggregated), TOPMed Bravo, GME Variome, Iranome, ExAC, 1000 Genomes, ESP 6500, 4.7KJPN, GenomeAsia, Mexican DB, India DB, Turkish Variome</b>                                                      | No Observation for this variant          |
| <b>Revel, EVE, Varsity, MUTAssessor, SIFT, Polyphen2, MT, FATHMM, DANN, MetaLR, PrimateAI, BayesDel, CardioBoost ARM, CardioBoost CM, dbscSNV Ada, dbscSNV RF, GERP, GenoCanyon, fitCons, Mitochondrial, MitoTip, APOGEE</b> | N/A                                      |
